# Supplementary material for: A Barcode-Based Phylogenetic Characterization of Phytophthora cactorum Identifies Two Cosmopolitan Lineages with Distinct Host Affinities and the First Report of Phytophthora pseudotsugae in California
Source: MDPI journal article supplement (doi:10.3390/jof8030303), 2022-03-16
Supplement: s1 [file s1]

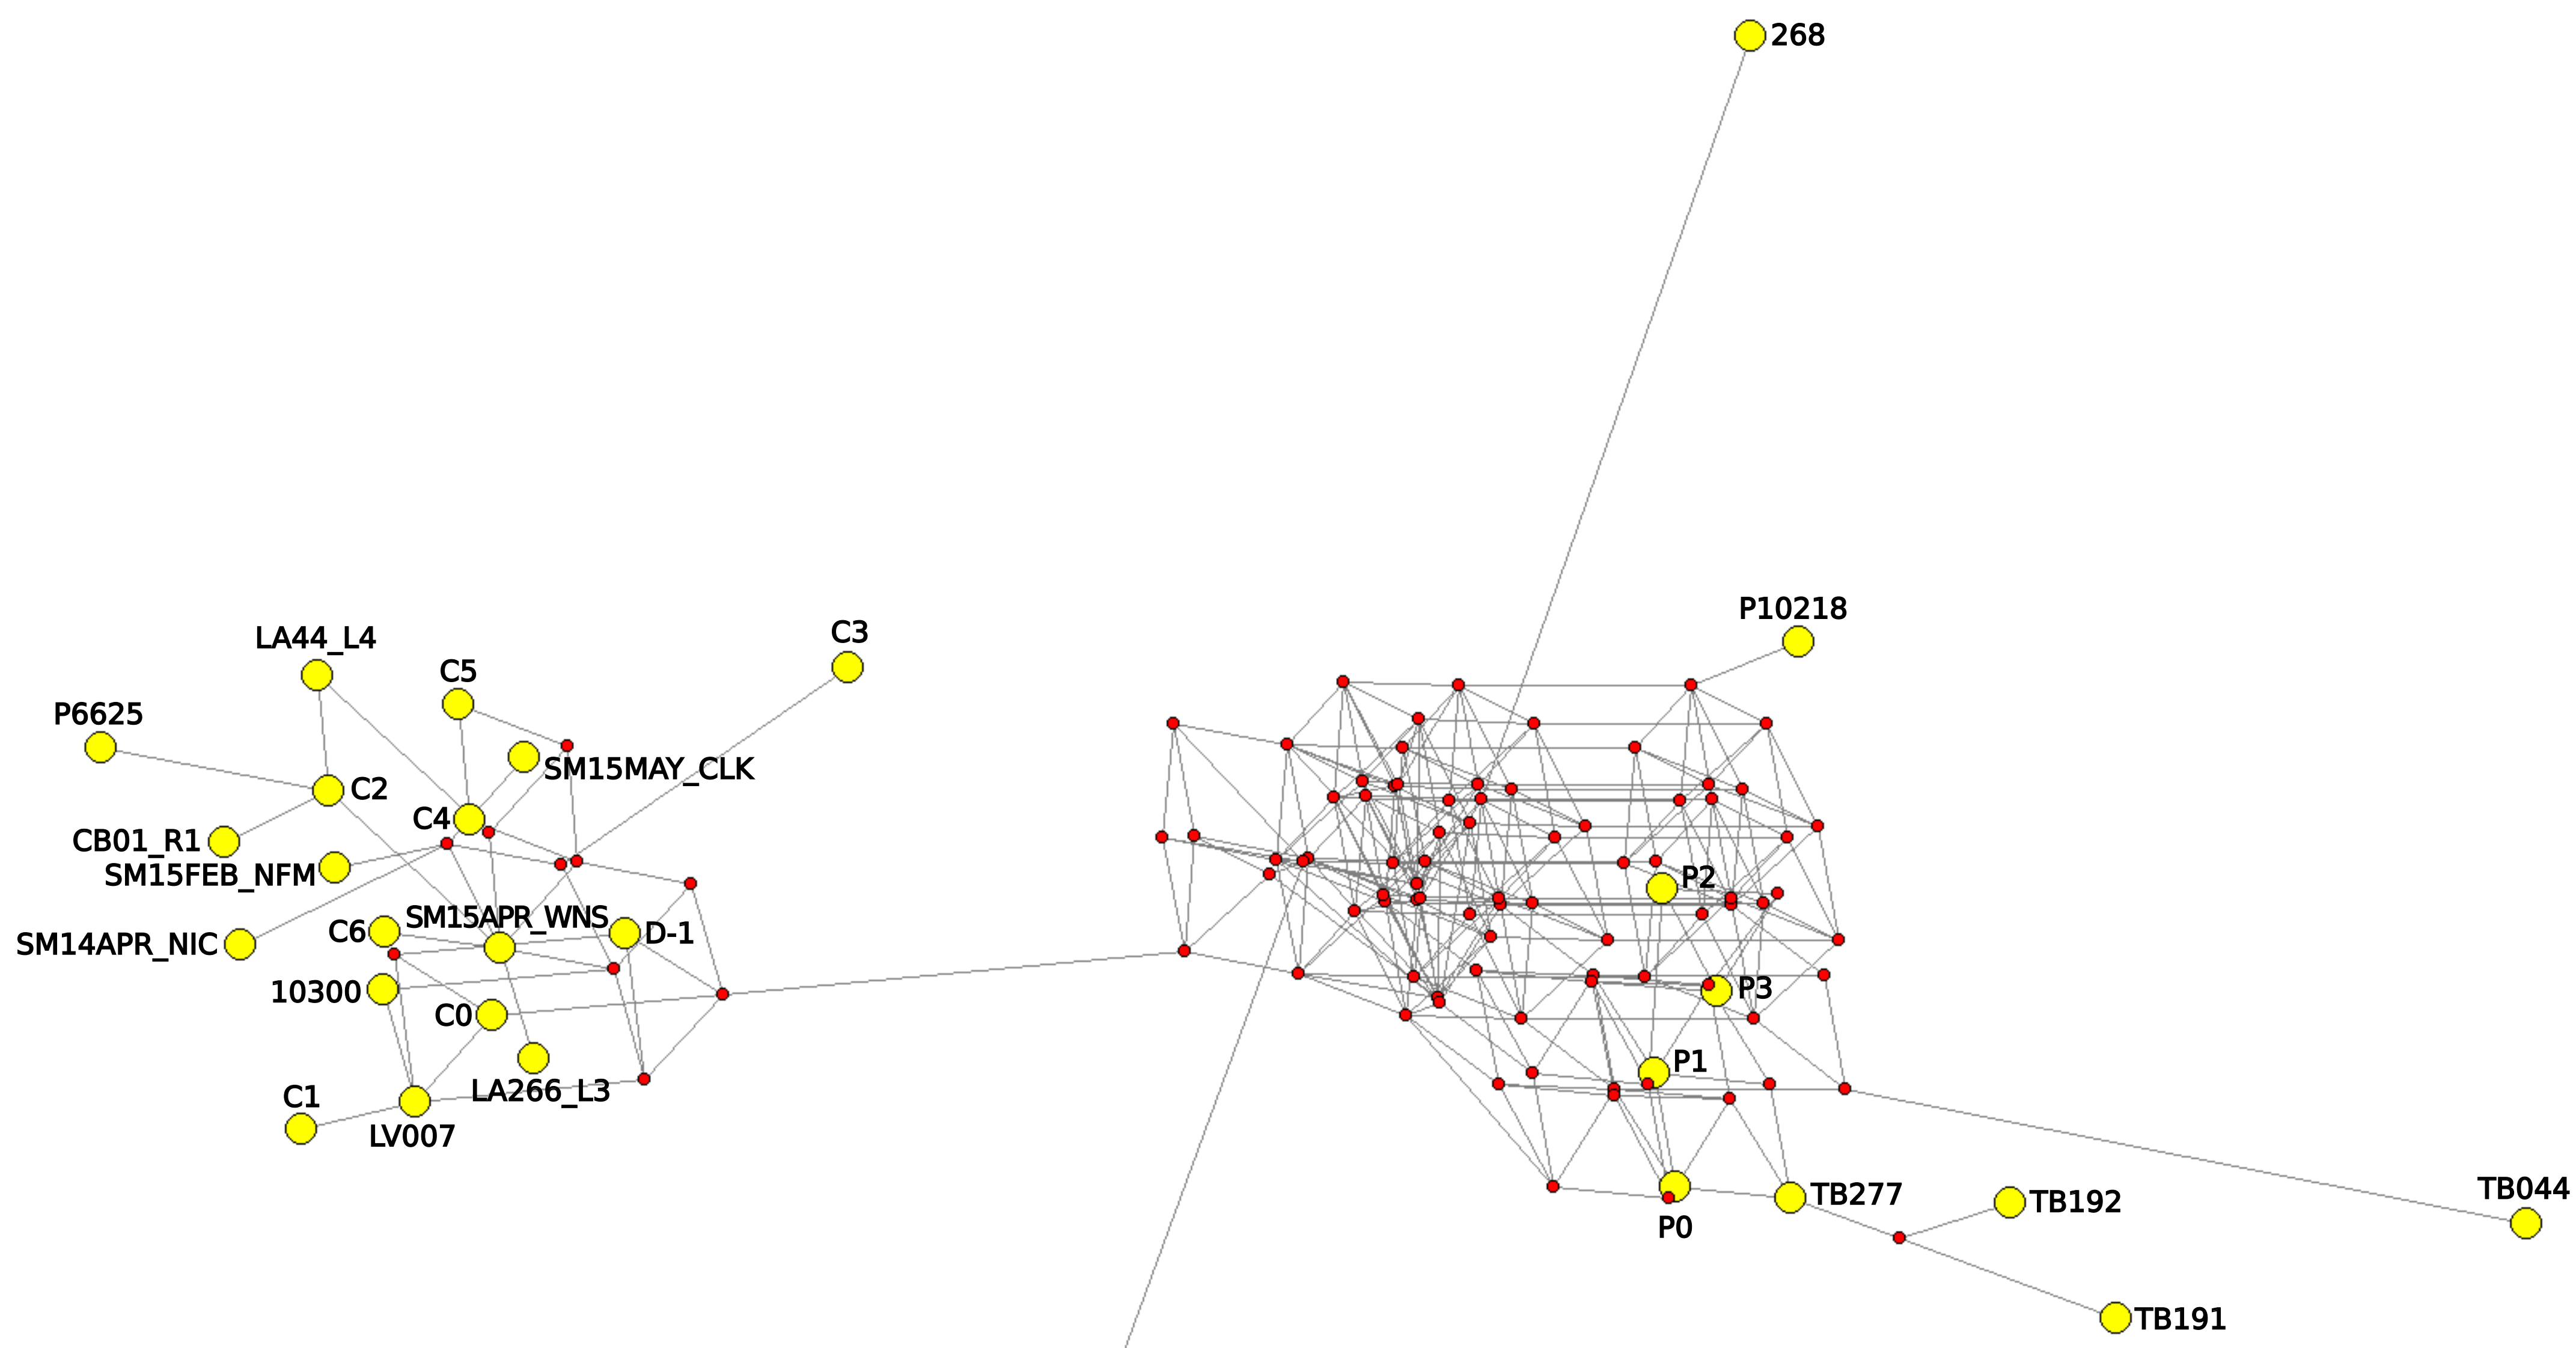

|                                                                               |                                                        |                                                                                  |                              |                                                                     |                                                                                                                      |                                                                           |
|-------------------------------------------------------------------------------|--------------------------------------------------------|----------------------------------------------------------------------------------|------------------------------|---------------------------------------------------------------------|----------------------------------------------------------------------------------------------------------------------|---------------------------------------------------------------------------|
| <b>C0</b><br>11/40<br>12/420<br>15/13<br>15/7<br>4040<br>P404<br>P415<br>P416 | <b>C1</b><br>2003-3<br>4032<br>P414<br>P421<br>PC13-15 | <b>C2</b><br>62471<br>Boo_HP_1<br>NZFS_3830<br>P0714<br>P10194<br>P295<br>R36_14 | <b>C3</b><br>17/21<br>P10365 | <b>C4</b><br>LA67_L1<br>SCVWD22<br>SCVWD113<br>SCVWD292<br>SCVWD551 | <b>C5</b><br>LA58_L1<br>LA56_L1<br>LA91_L2<br>LA548_L2<br>LA551_R1<br>PR150226-01W<br>SCVWD38<br>SCVWD66<br>SCVWD230 | <b>C6</b><br>SM14MAY_PCK<br>SM15APR_MIN_A<br>SM15FEB_PCK_A<br>SM15MAR_PCK |
|                                                                               |                                                        |                                                                                  |                              |                                                                     |                                                                                                                      |                                                                           |
| <b>P0</b><br>ABS-BS-2015(140)<br>SM10JUL_RNPTV                                |                                                        | <b>P1</b><br>TB204<br>TB206                                                      | <b>P2</b><br>TB224<br>TB228  | <b>P3</b><br>TB138<br>TB329                                         |                                                                                                                      |                                                                           |
