# Supplementary figures and images for: A Barcode-Based Phylogenetic Characterization of Phytophthora cactorum Identifies Two Cosmopolitan Lineages with Distinct Host Affinities and the First Report of Phytophthora pseudotsugae in California
Source: MDPI journal article supplement (doi:10.3390/jof8030303), 2022-03-16

cox1-only

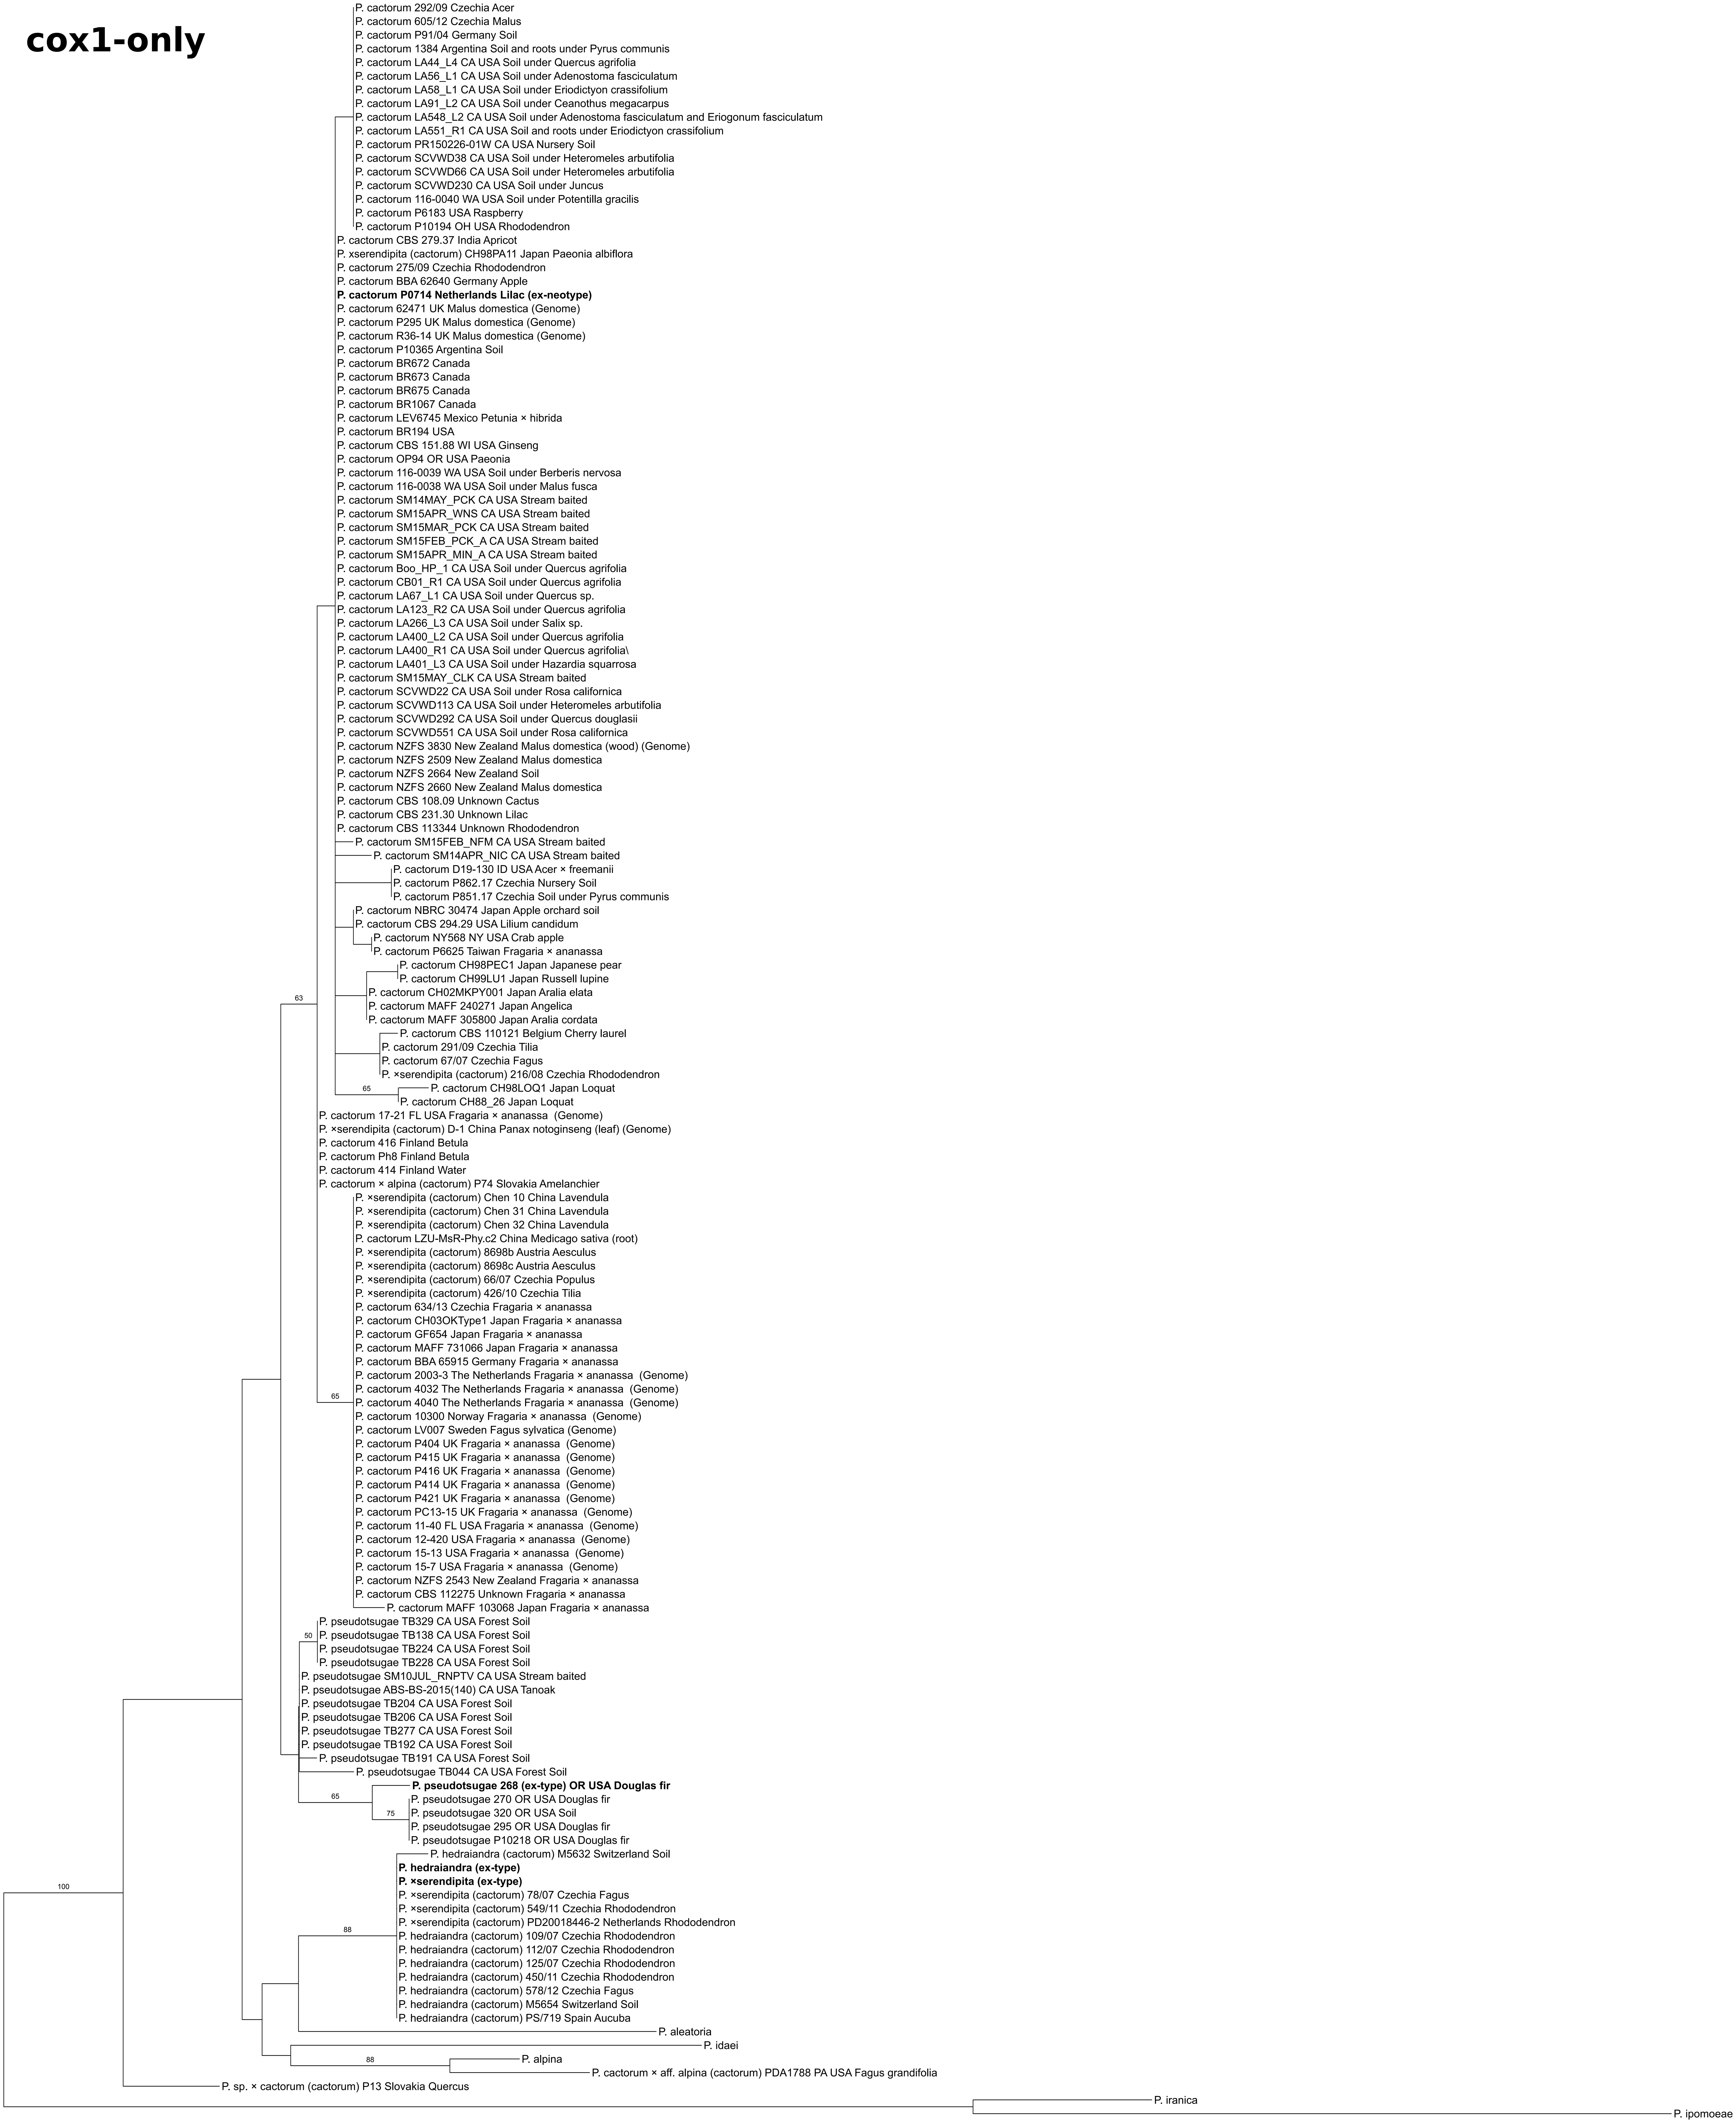

Supplement: s1 [file s1]

ITS-only

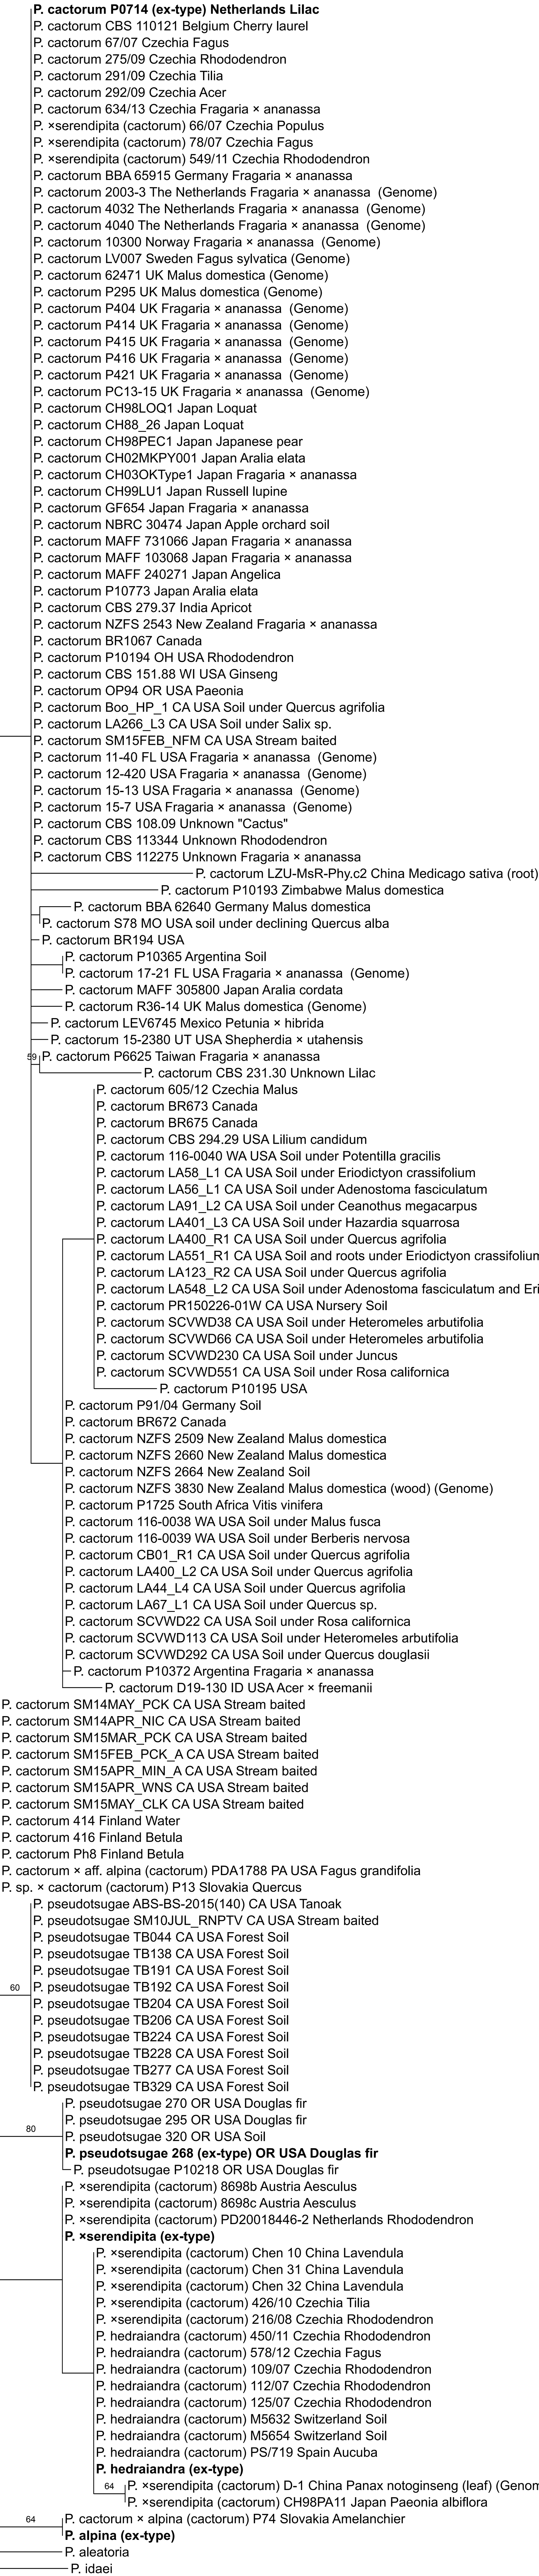

Supplement: s1 [file s1]

cox2+spacer-only

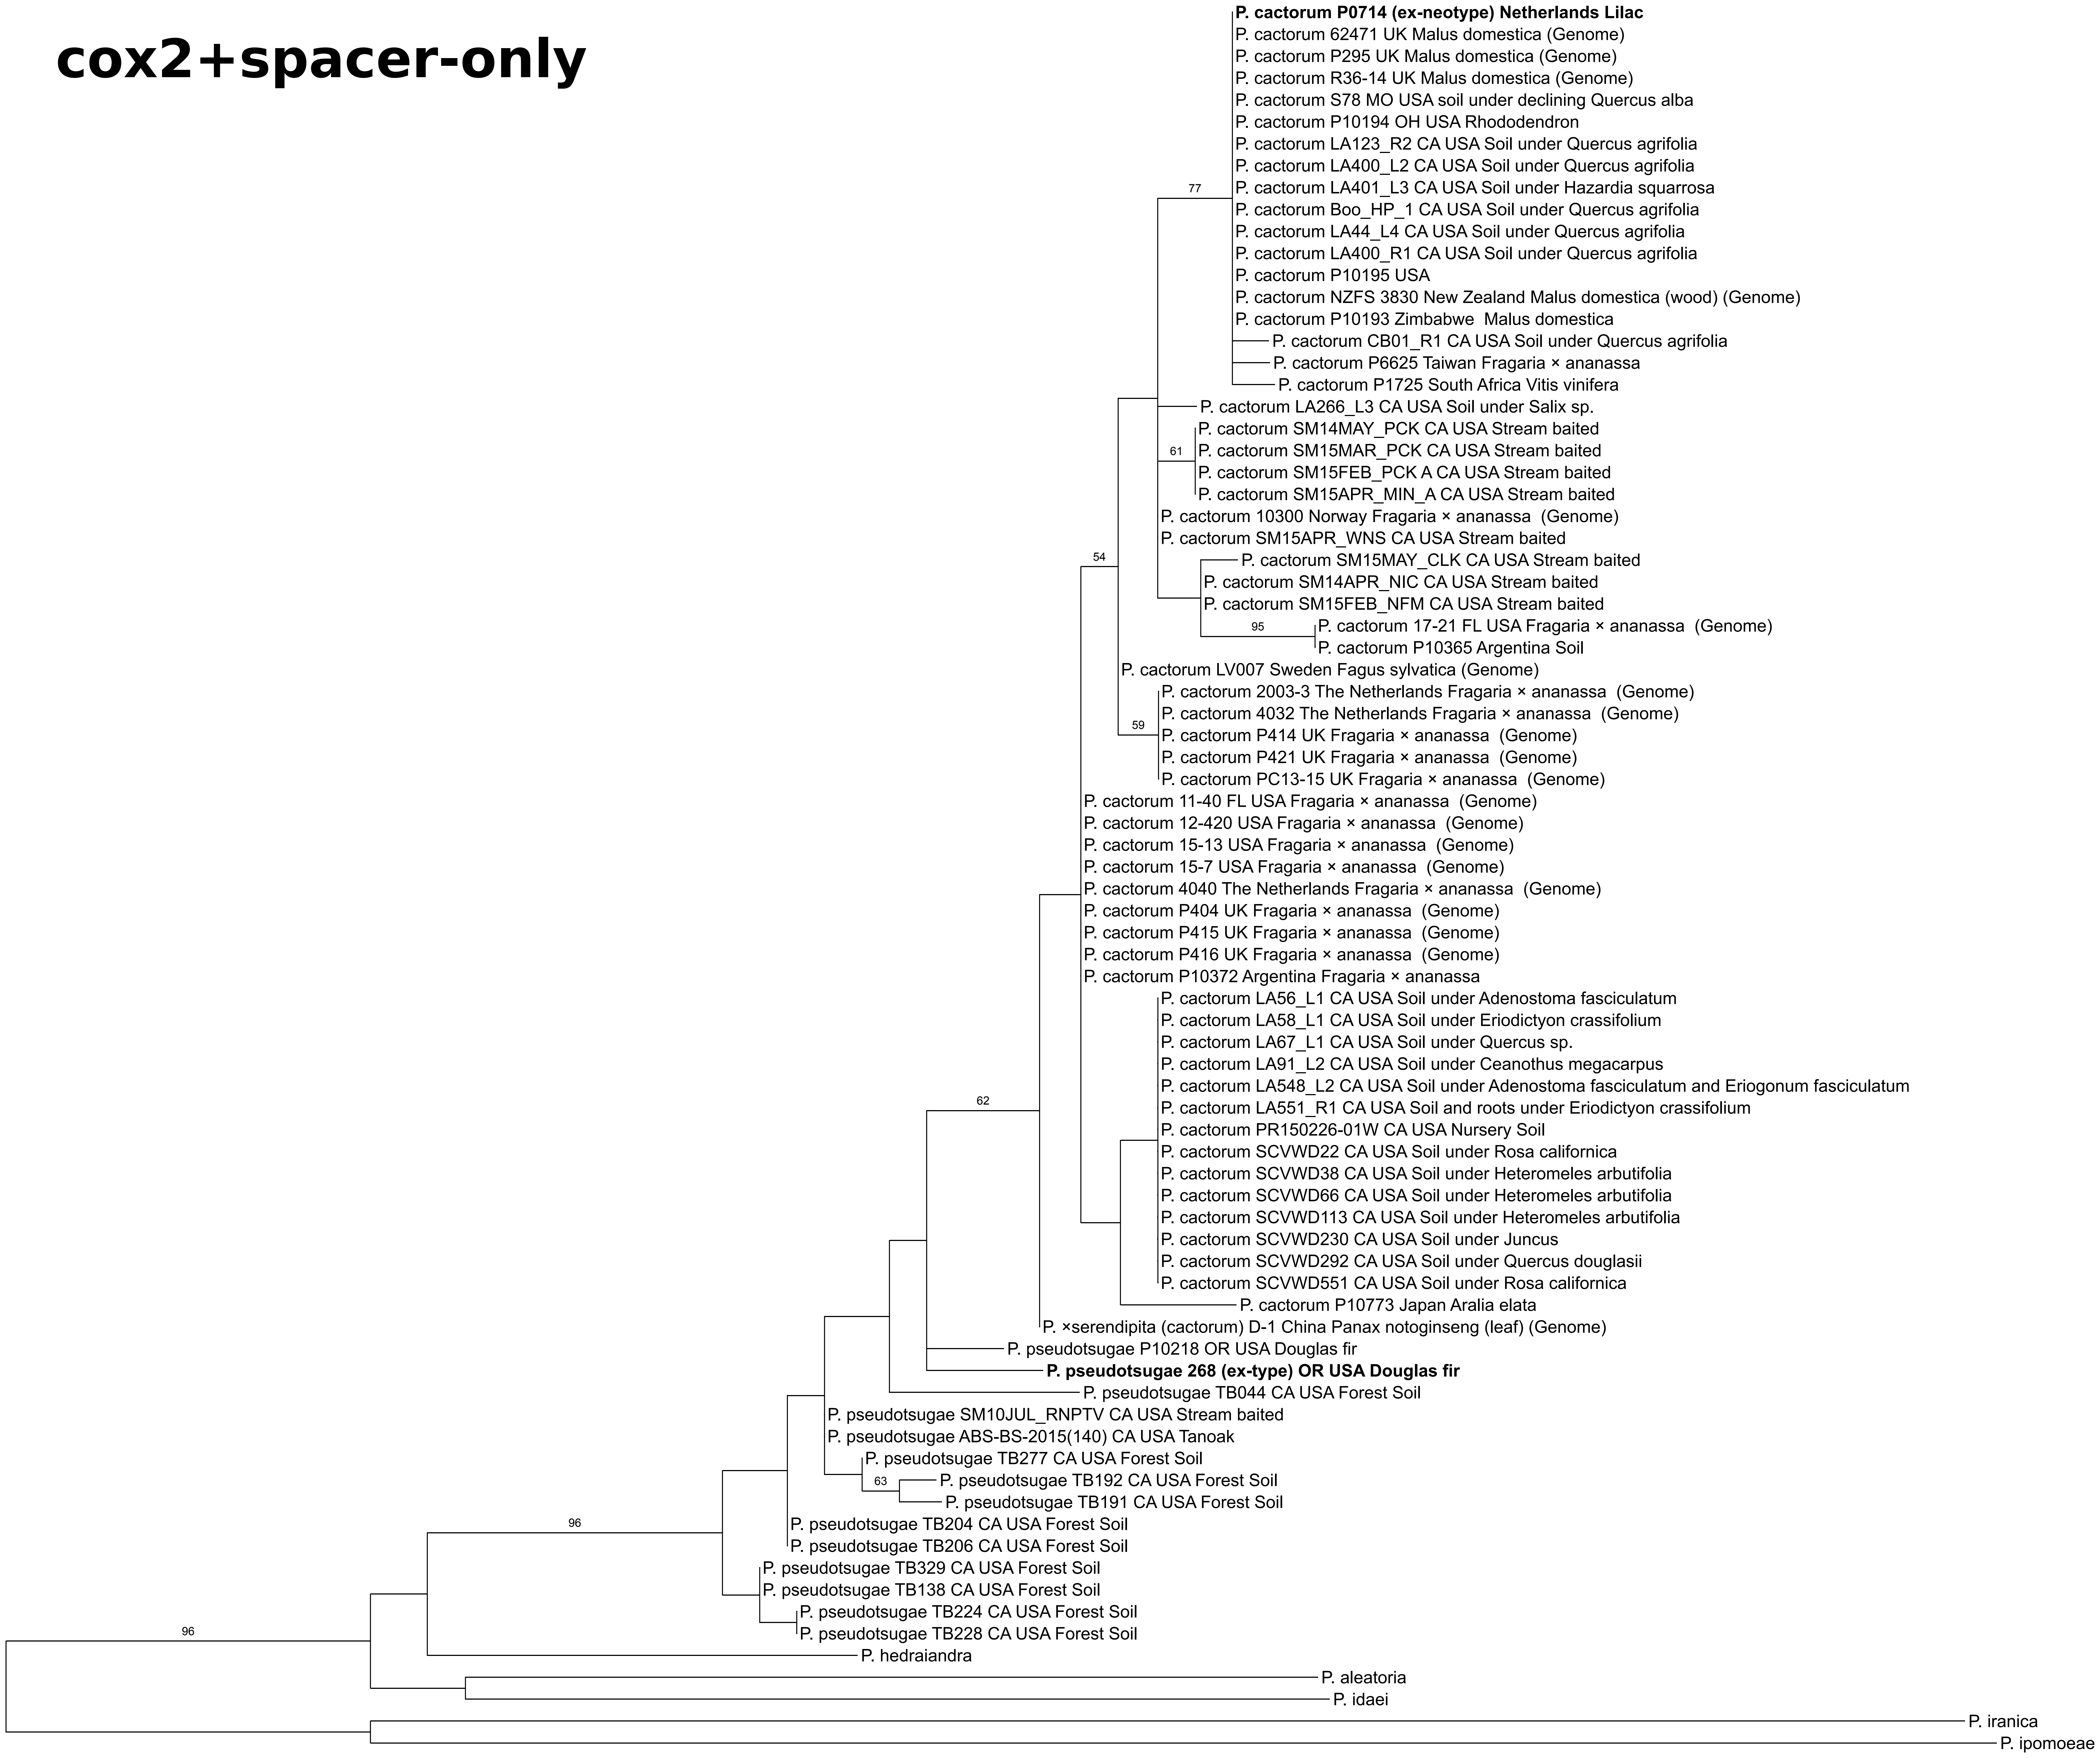

Supplement: s1 [file s1]

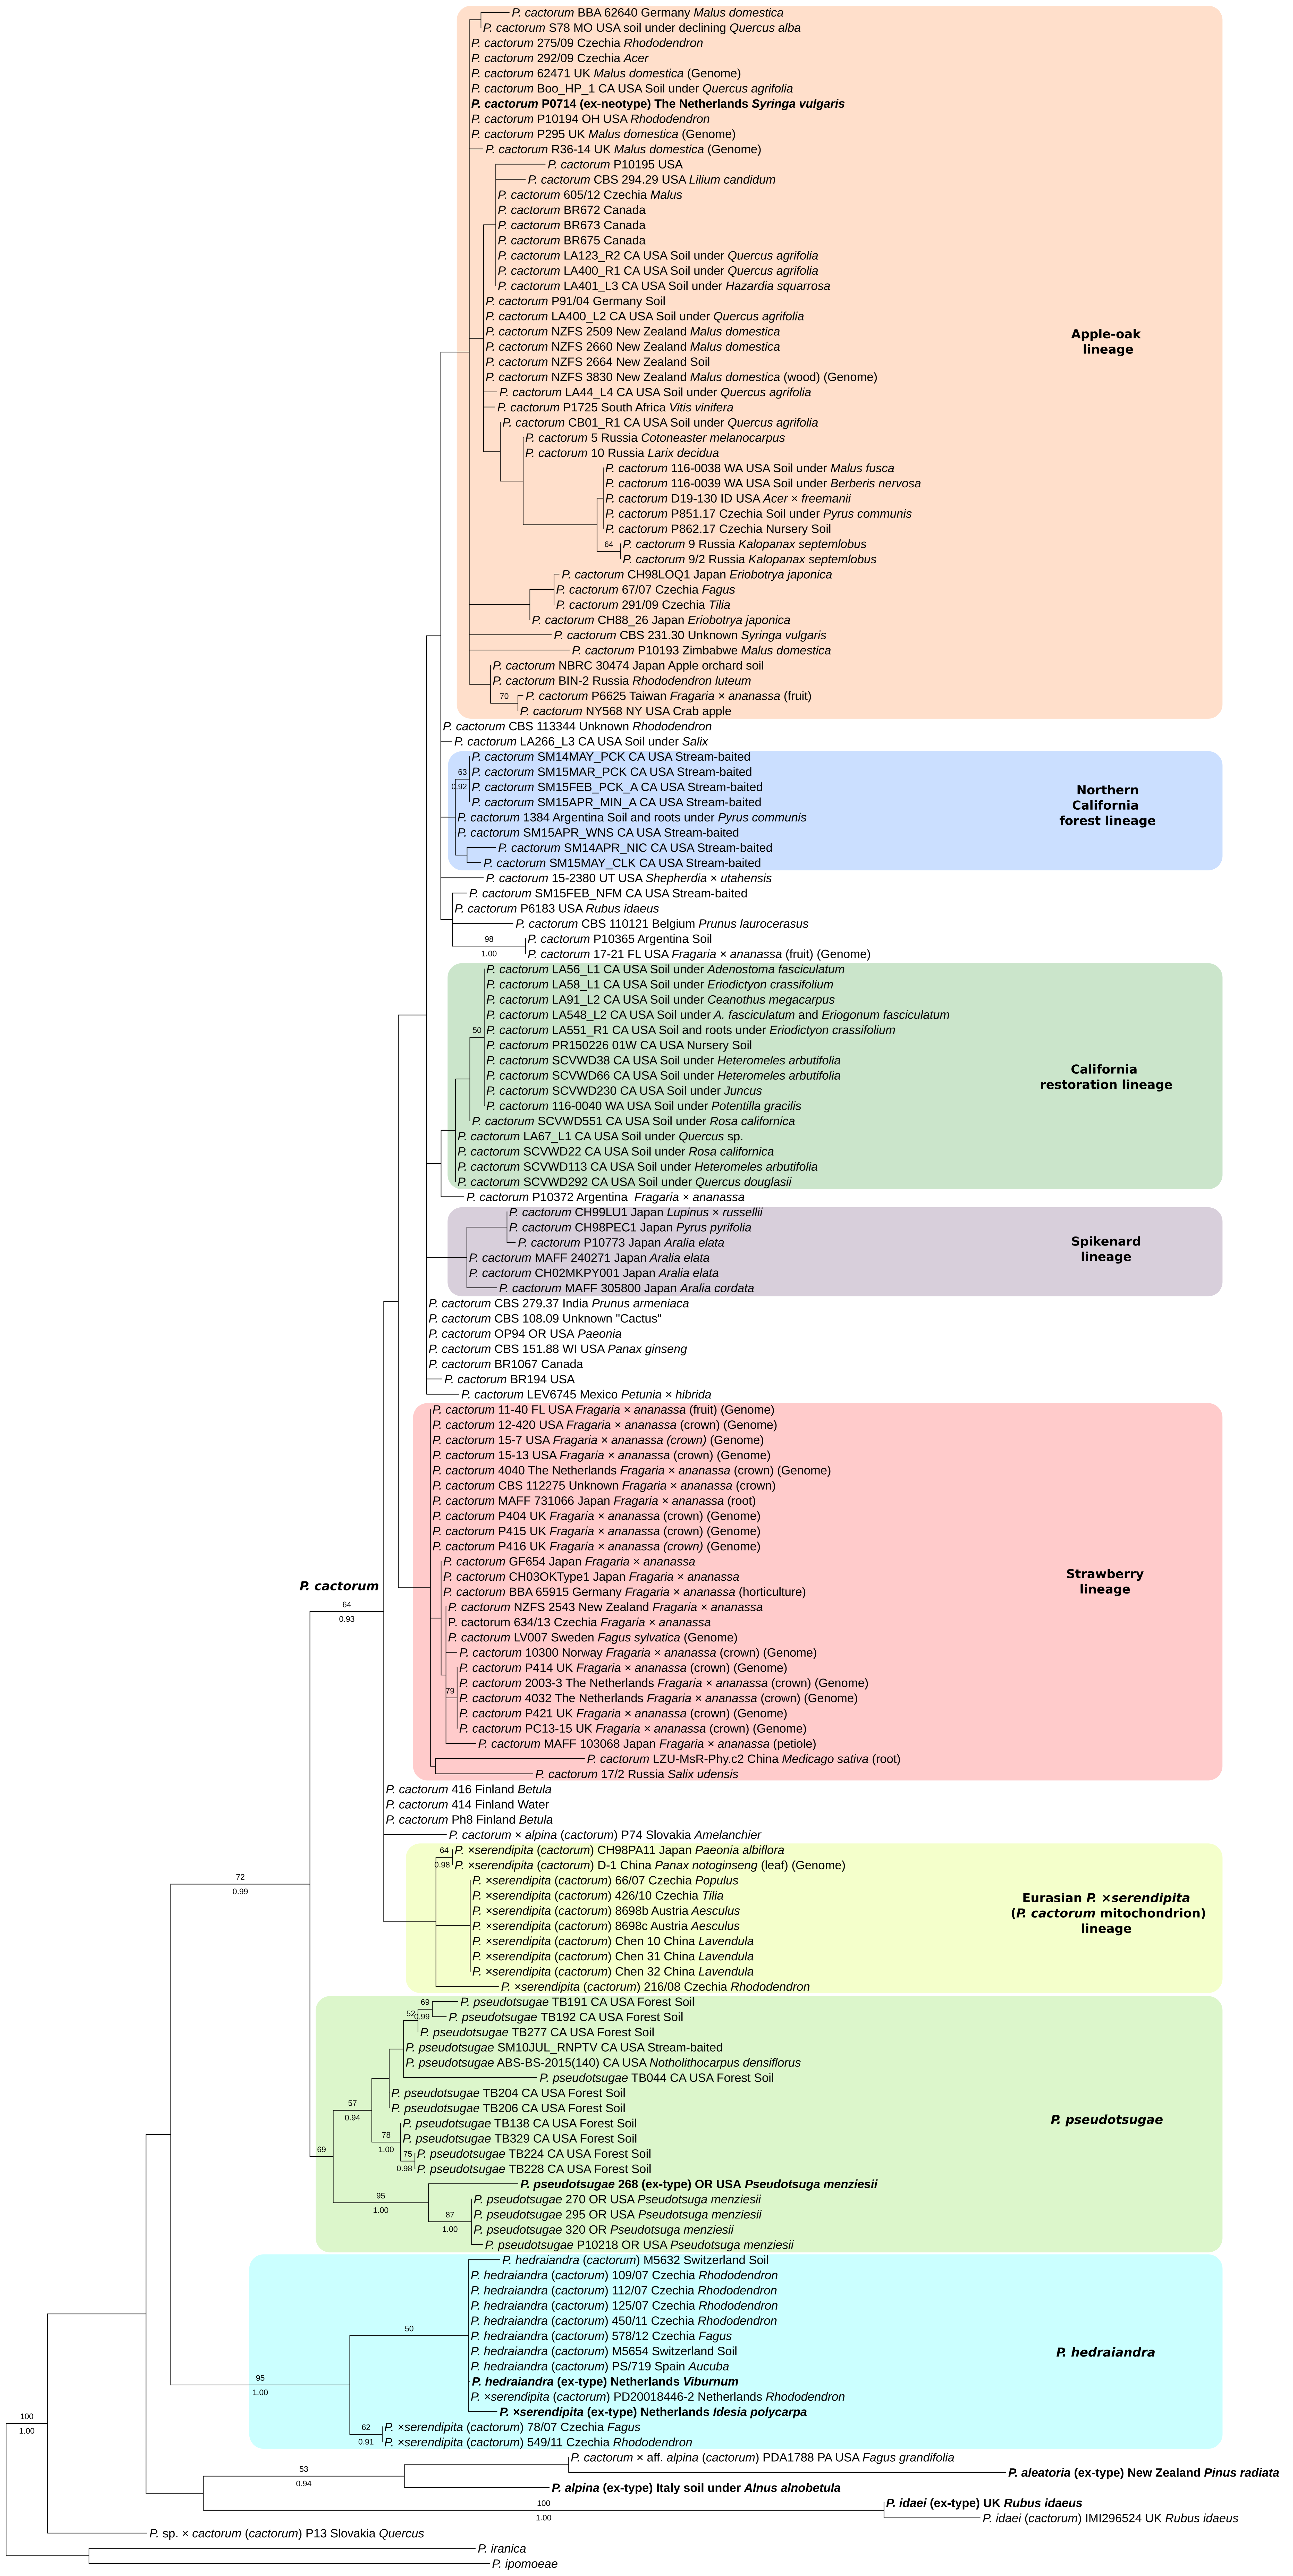

Supplement: s1 [file s1]
